# Supplementary material for: Visualization of deglutition and gastroesophageal reflux using real-time MRI: a standardized approach to image acquisition and assessment
Source: Springer Nature journal article supplement (doi:10.1038/s41598-023-49776-w), 2023-12-21
Supplement: MOESM1 [file 41598_2023_49776_MOESM1_ESM.pdf › 41598_2023_49776_MOESM1_ESM.pdf]

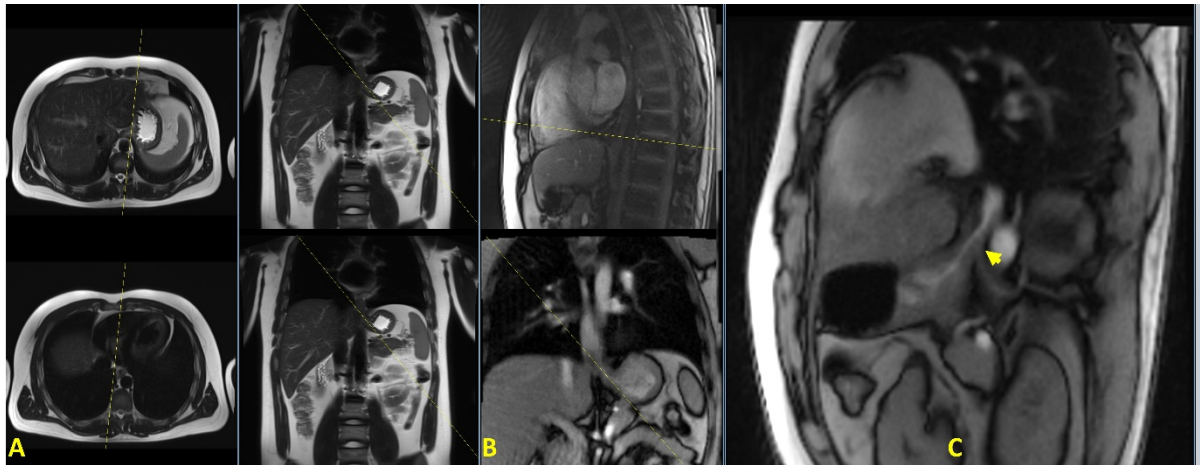

**Figure S1: Definition of para-axial real-time MRI of LES.** In case of insufficient visualization of the LES in sagittal and coronal real-time MRI planes, a para-axial LES plane was established. (A) Axial and coronal HASTE planning images for the para-axial LES plane. (B) Previously acquired real-time MRI planes for optimization of the (C) para-axial plane orientation.
